# Supplementary material for: Comparative Benchmarking of Optical Genome Mapping and Chromosomal Microarray Reveals High Technological Concordance in CNV Identification and Additional Structural Variant Refinement
Source: MDPI journal article supplement (doi:10.3390/genes14101868), 2023-09-26
Supplement: s1 [file s1]

A.

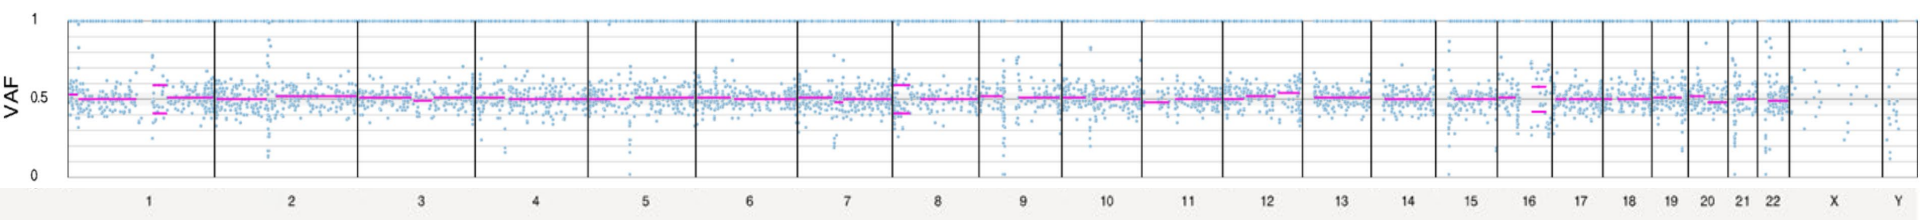

B.

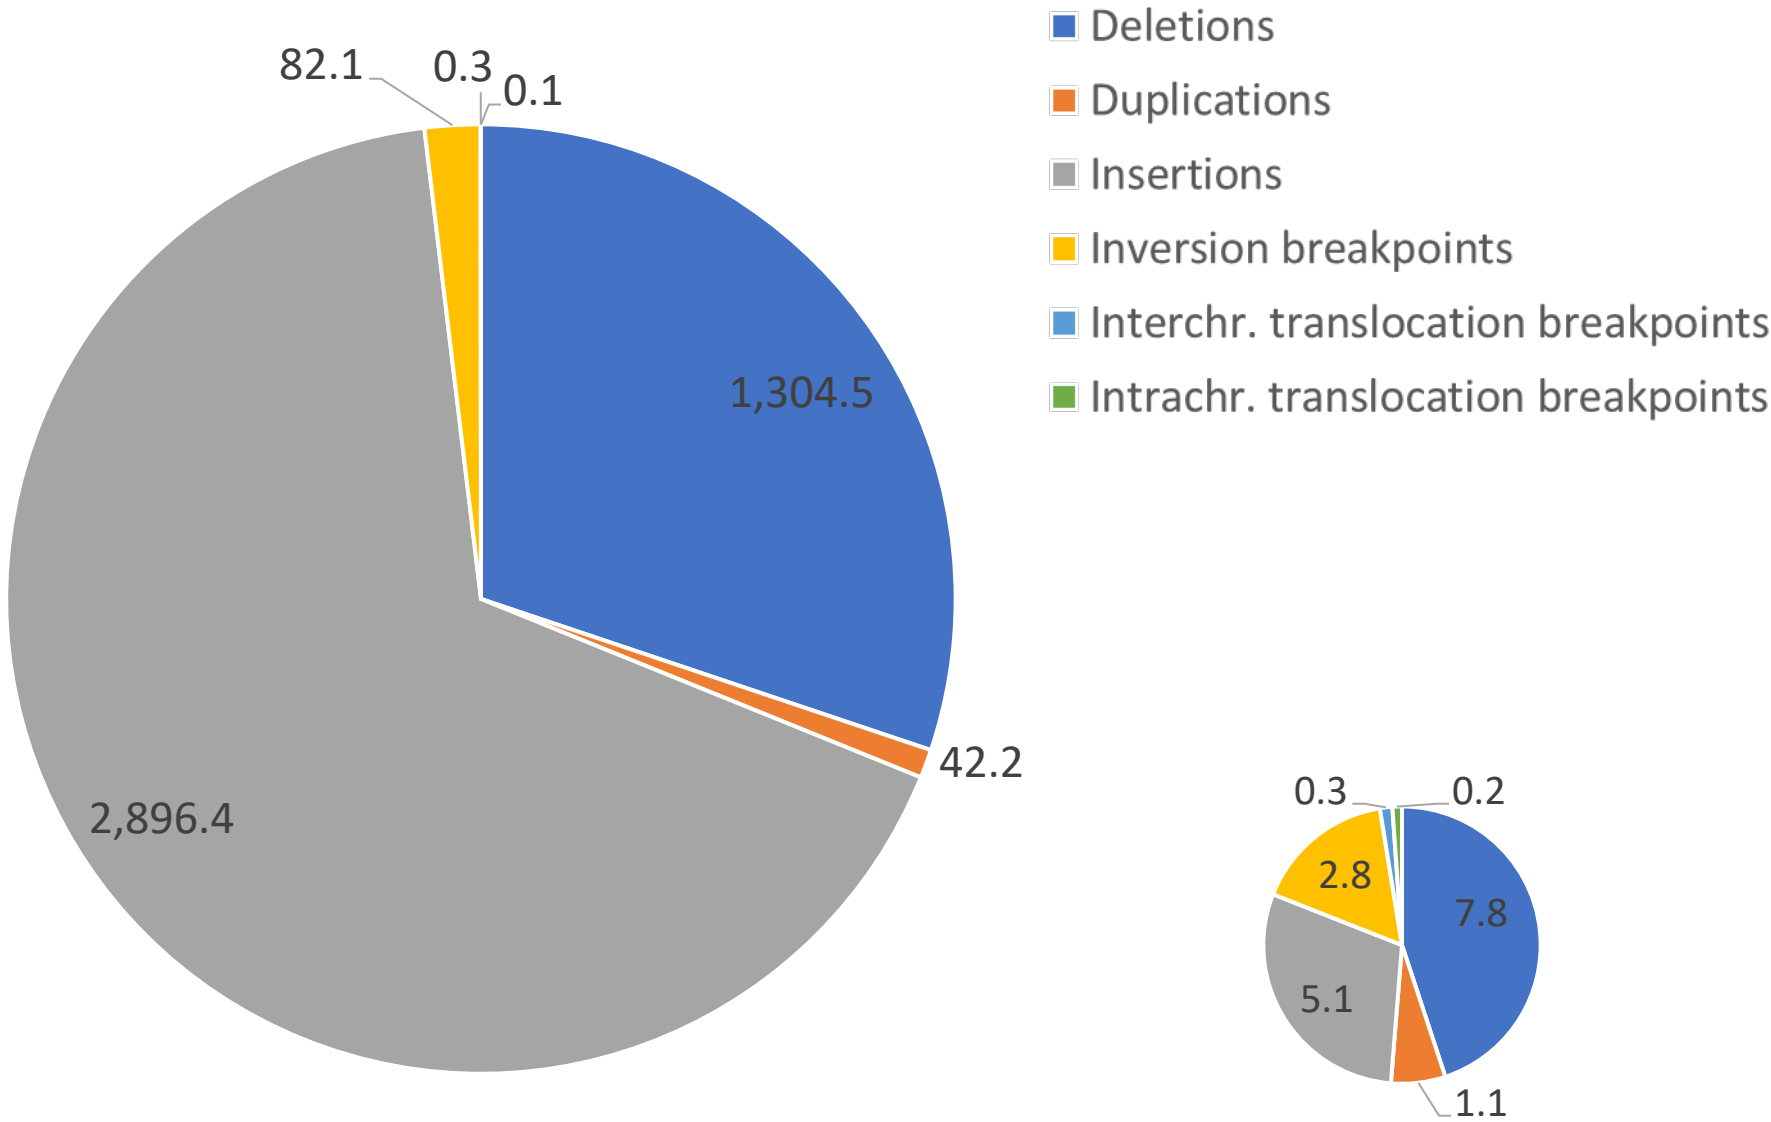

C.

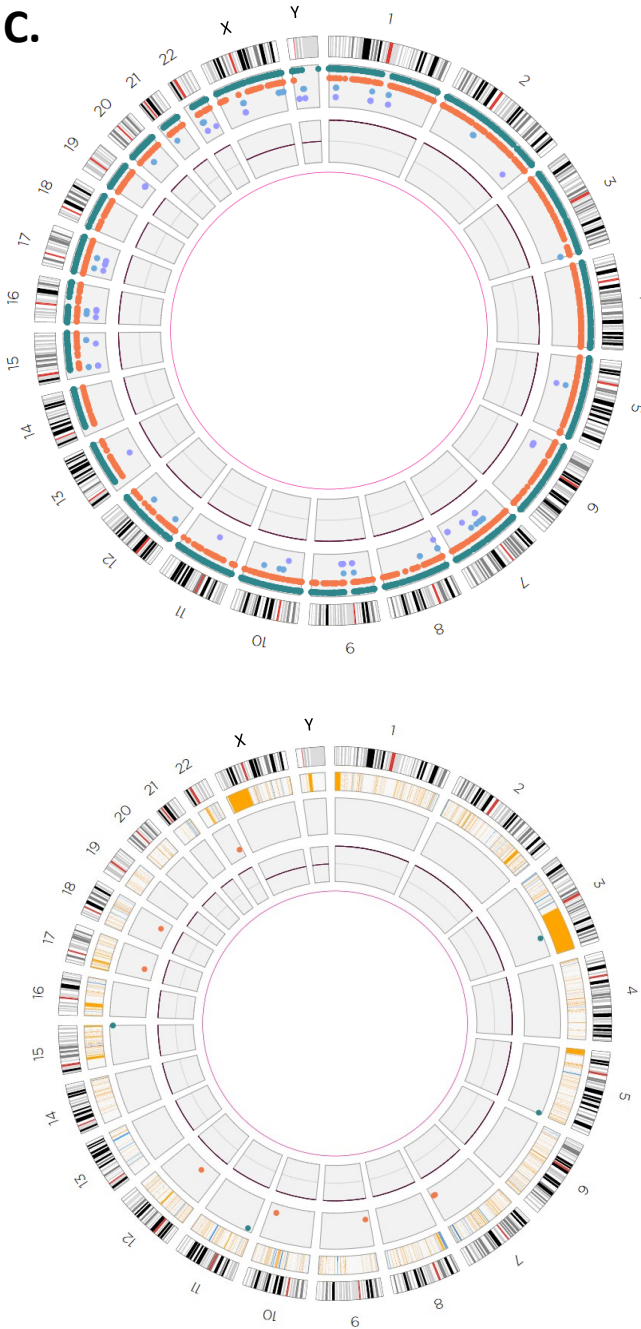

|             |                         | All  | Post filter |
|-------------|-------------------------|------|-------------|
| <div></div> | Deletions               | 1317 | 9           |
| <div></div> | Duplications            | 42   | 0           |
| <div></div> | Insertions              | 2889 | 5           |
| <div></div> | Inversions              | 90   | 4           |
| <div></div> | Interchr translocations | 0    | 0           |
| <div></div> | Intrachr translocations | 0    | 0           |
| Total       |                         | 4338 | 17          |

Known regions associated with constitutional disorders
