# Supplementary figures and images for: Comparative Benchmarking of Optical Genome Mapping and Chromosomal Microarray Reveals High Technological Concordance in CNV Identification and Additional Structural Variant Refinement
Source: MDPI journal article supplement (doi:10.3390/genes14101868), 2023-09-26

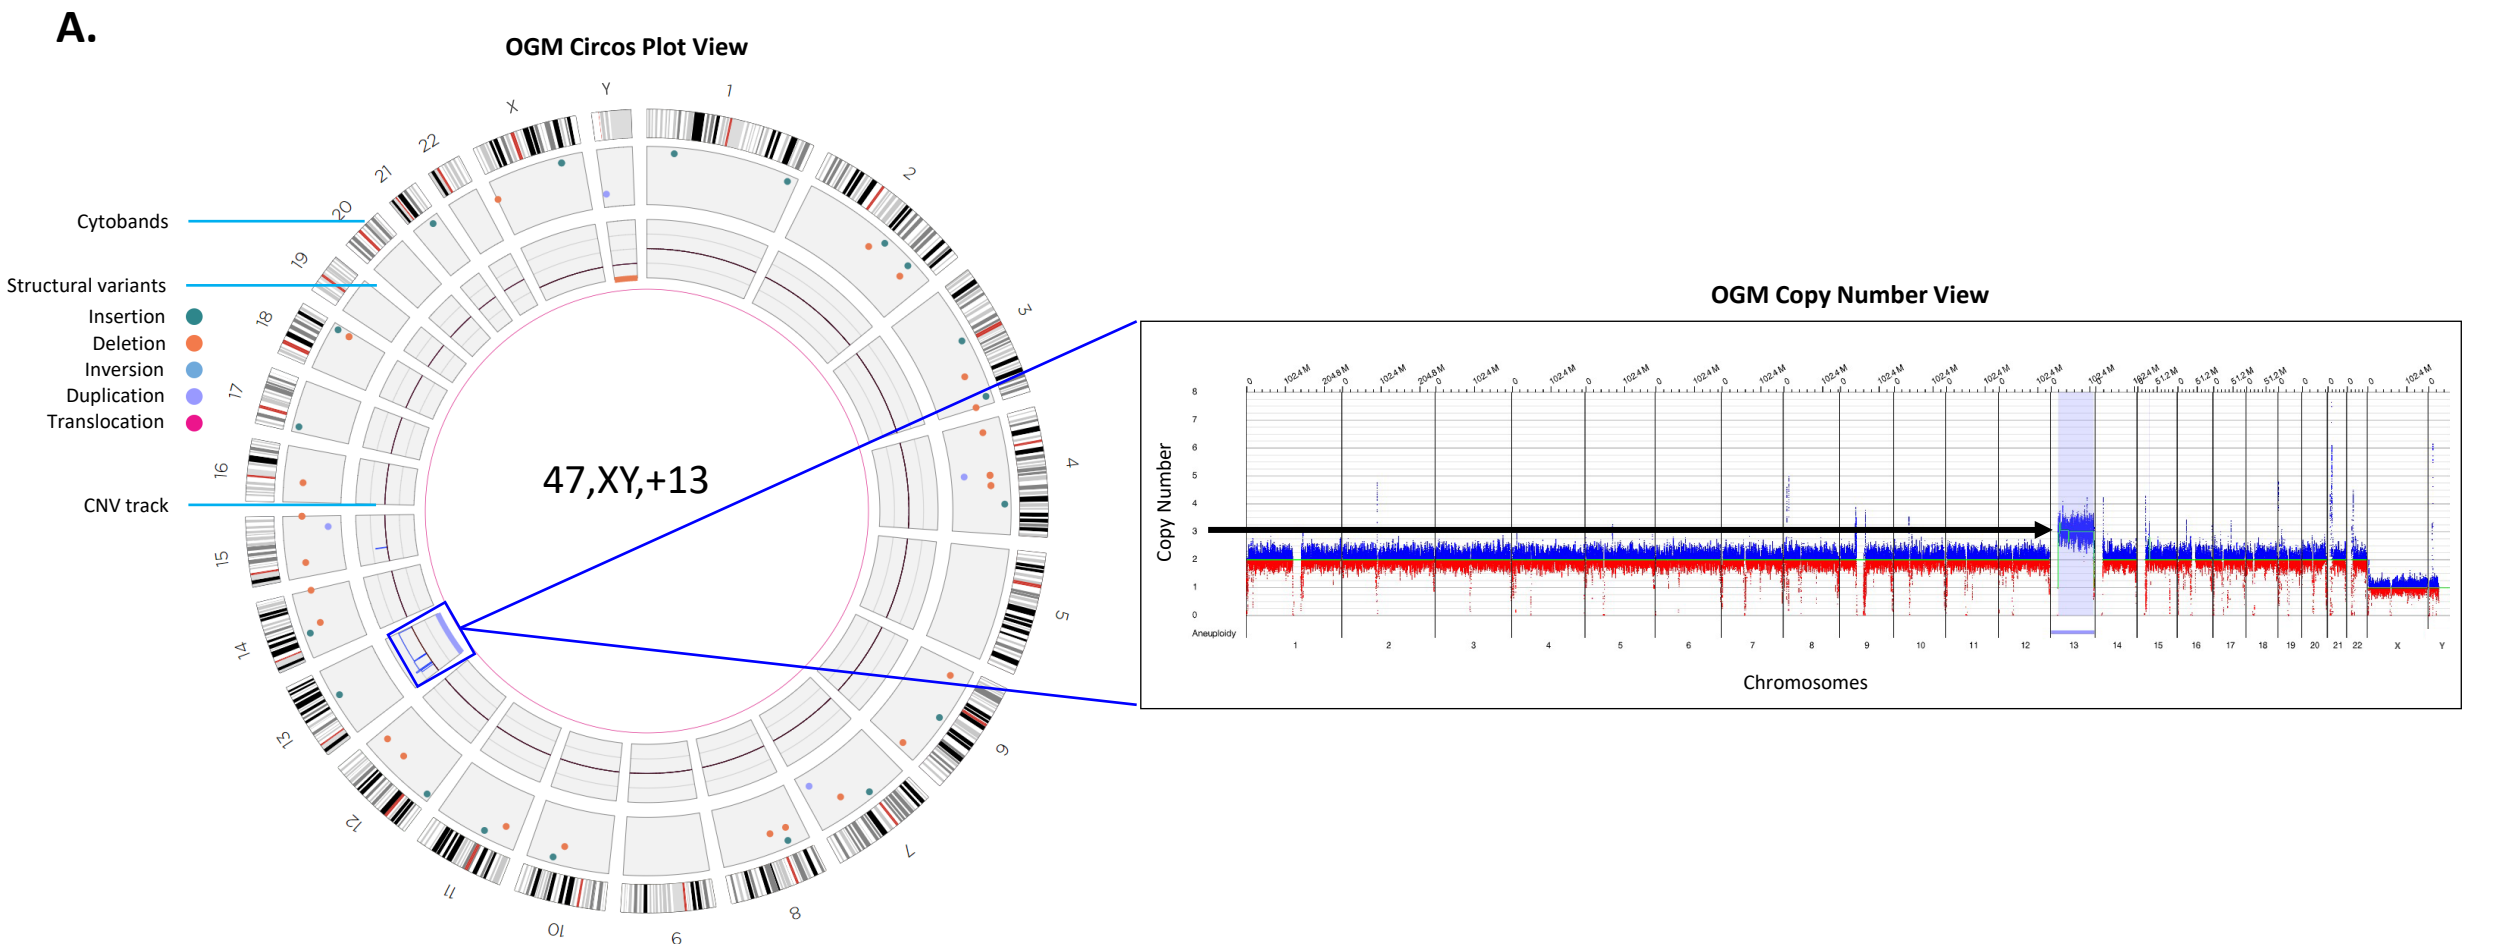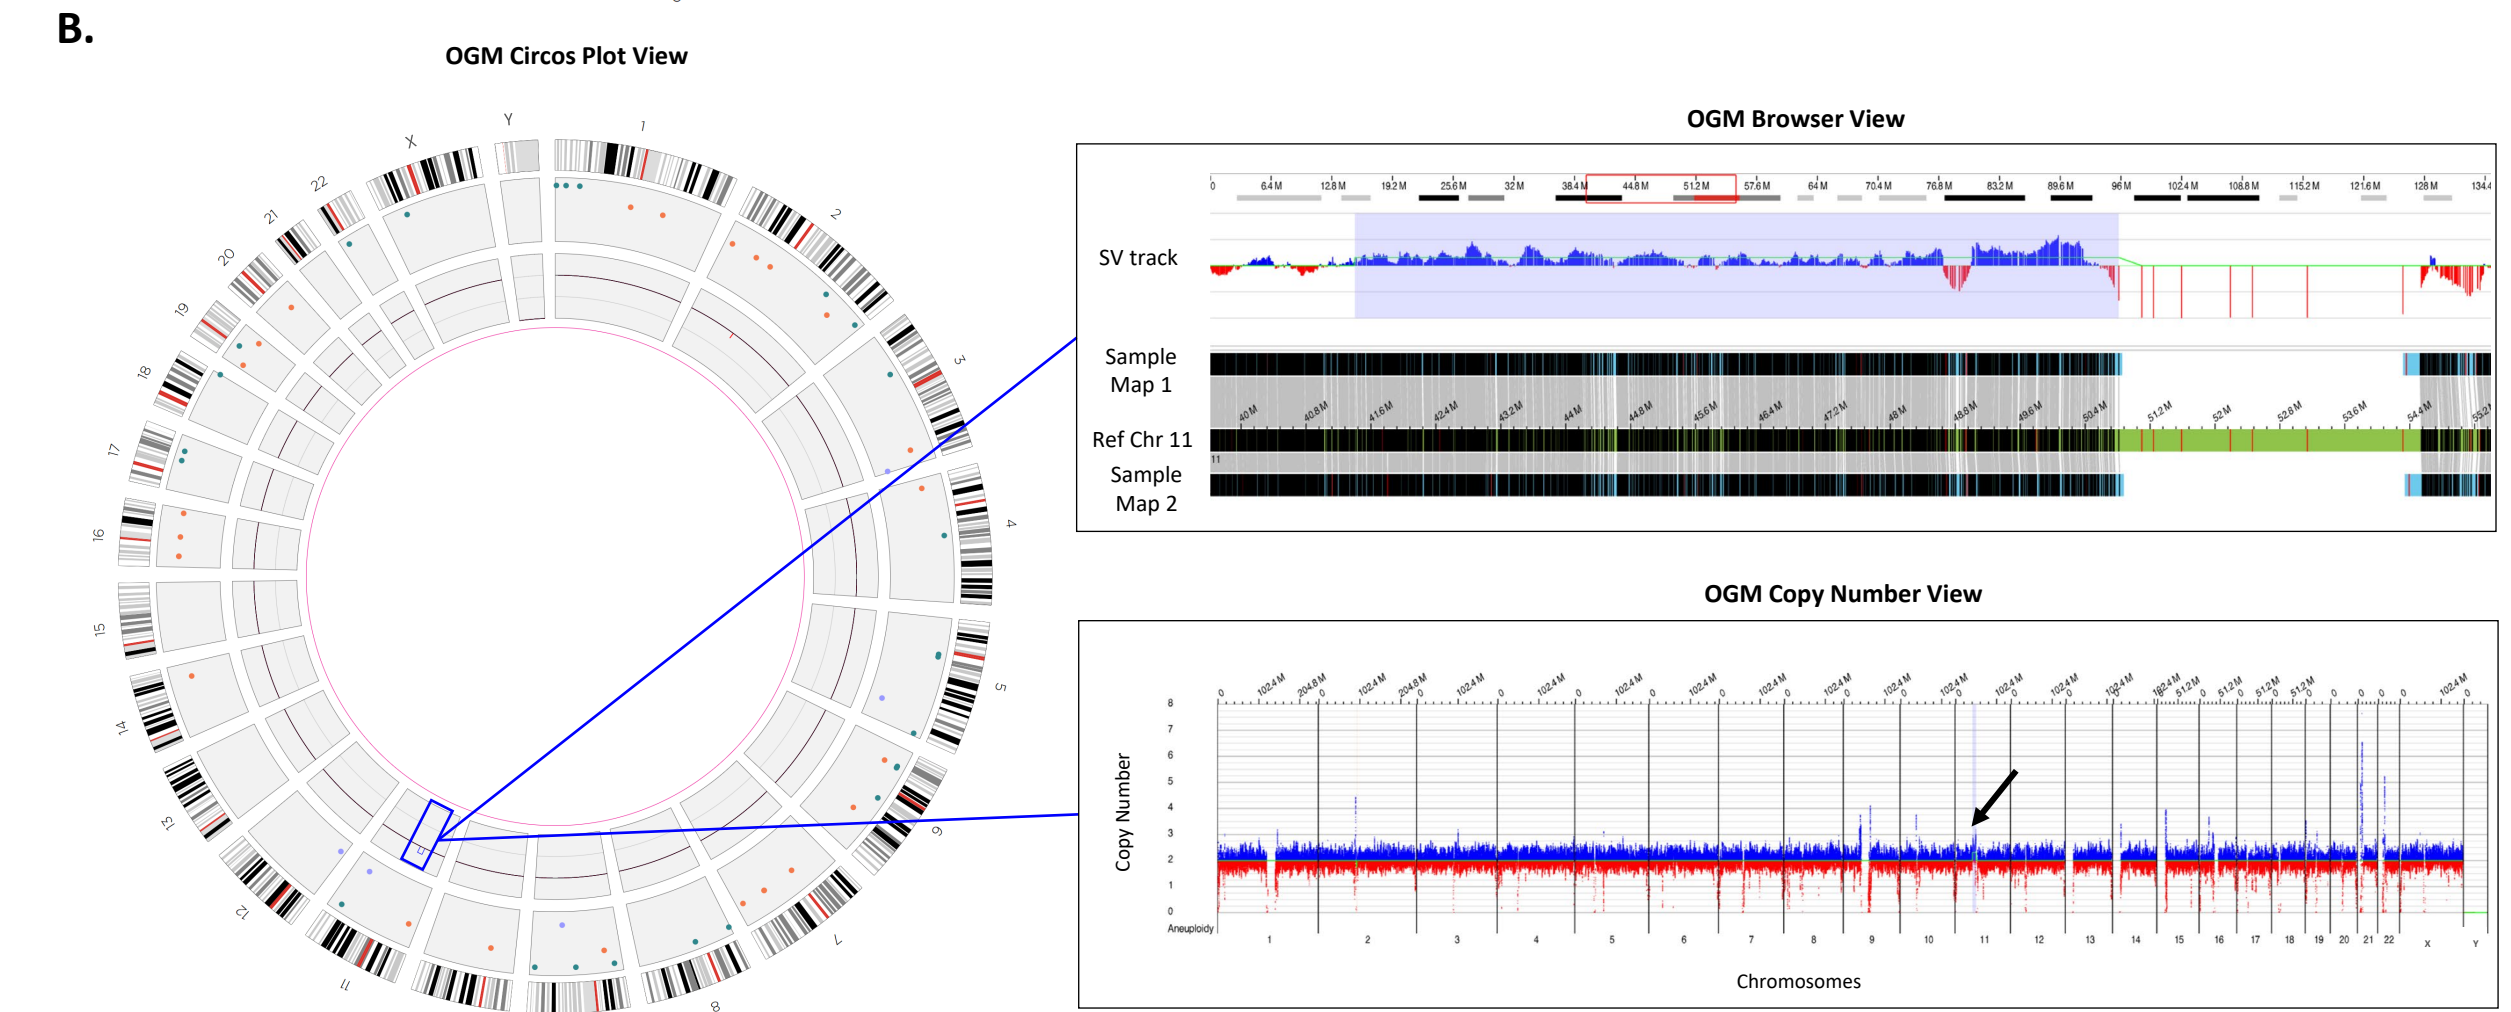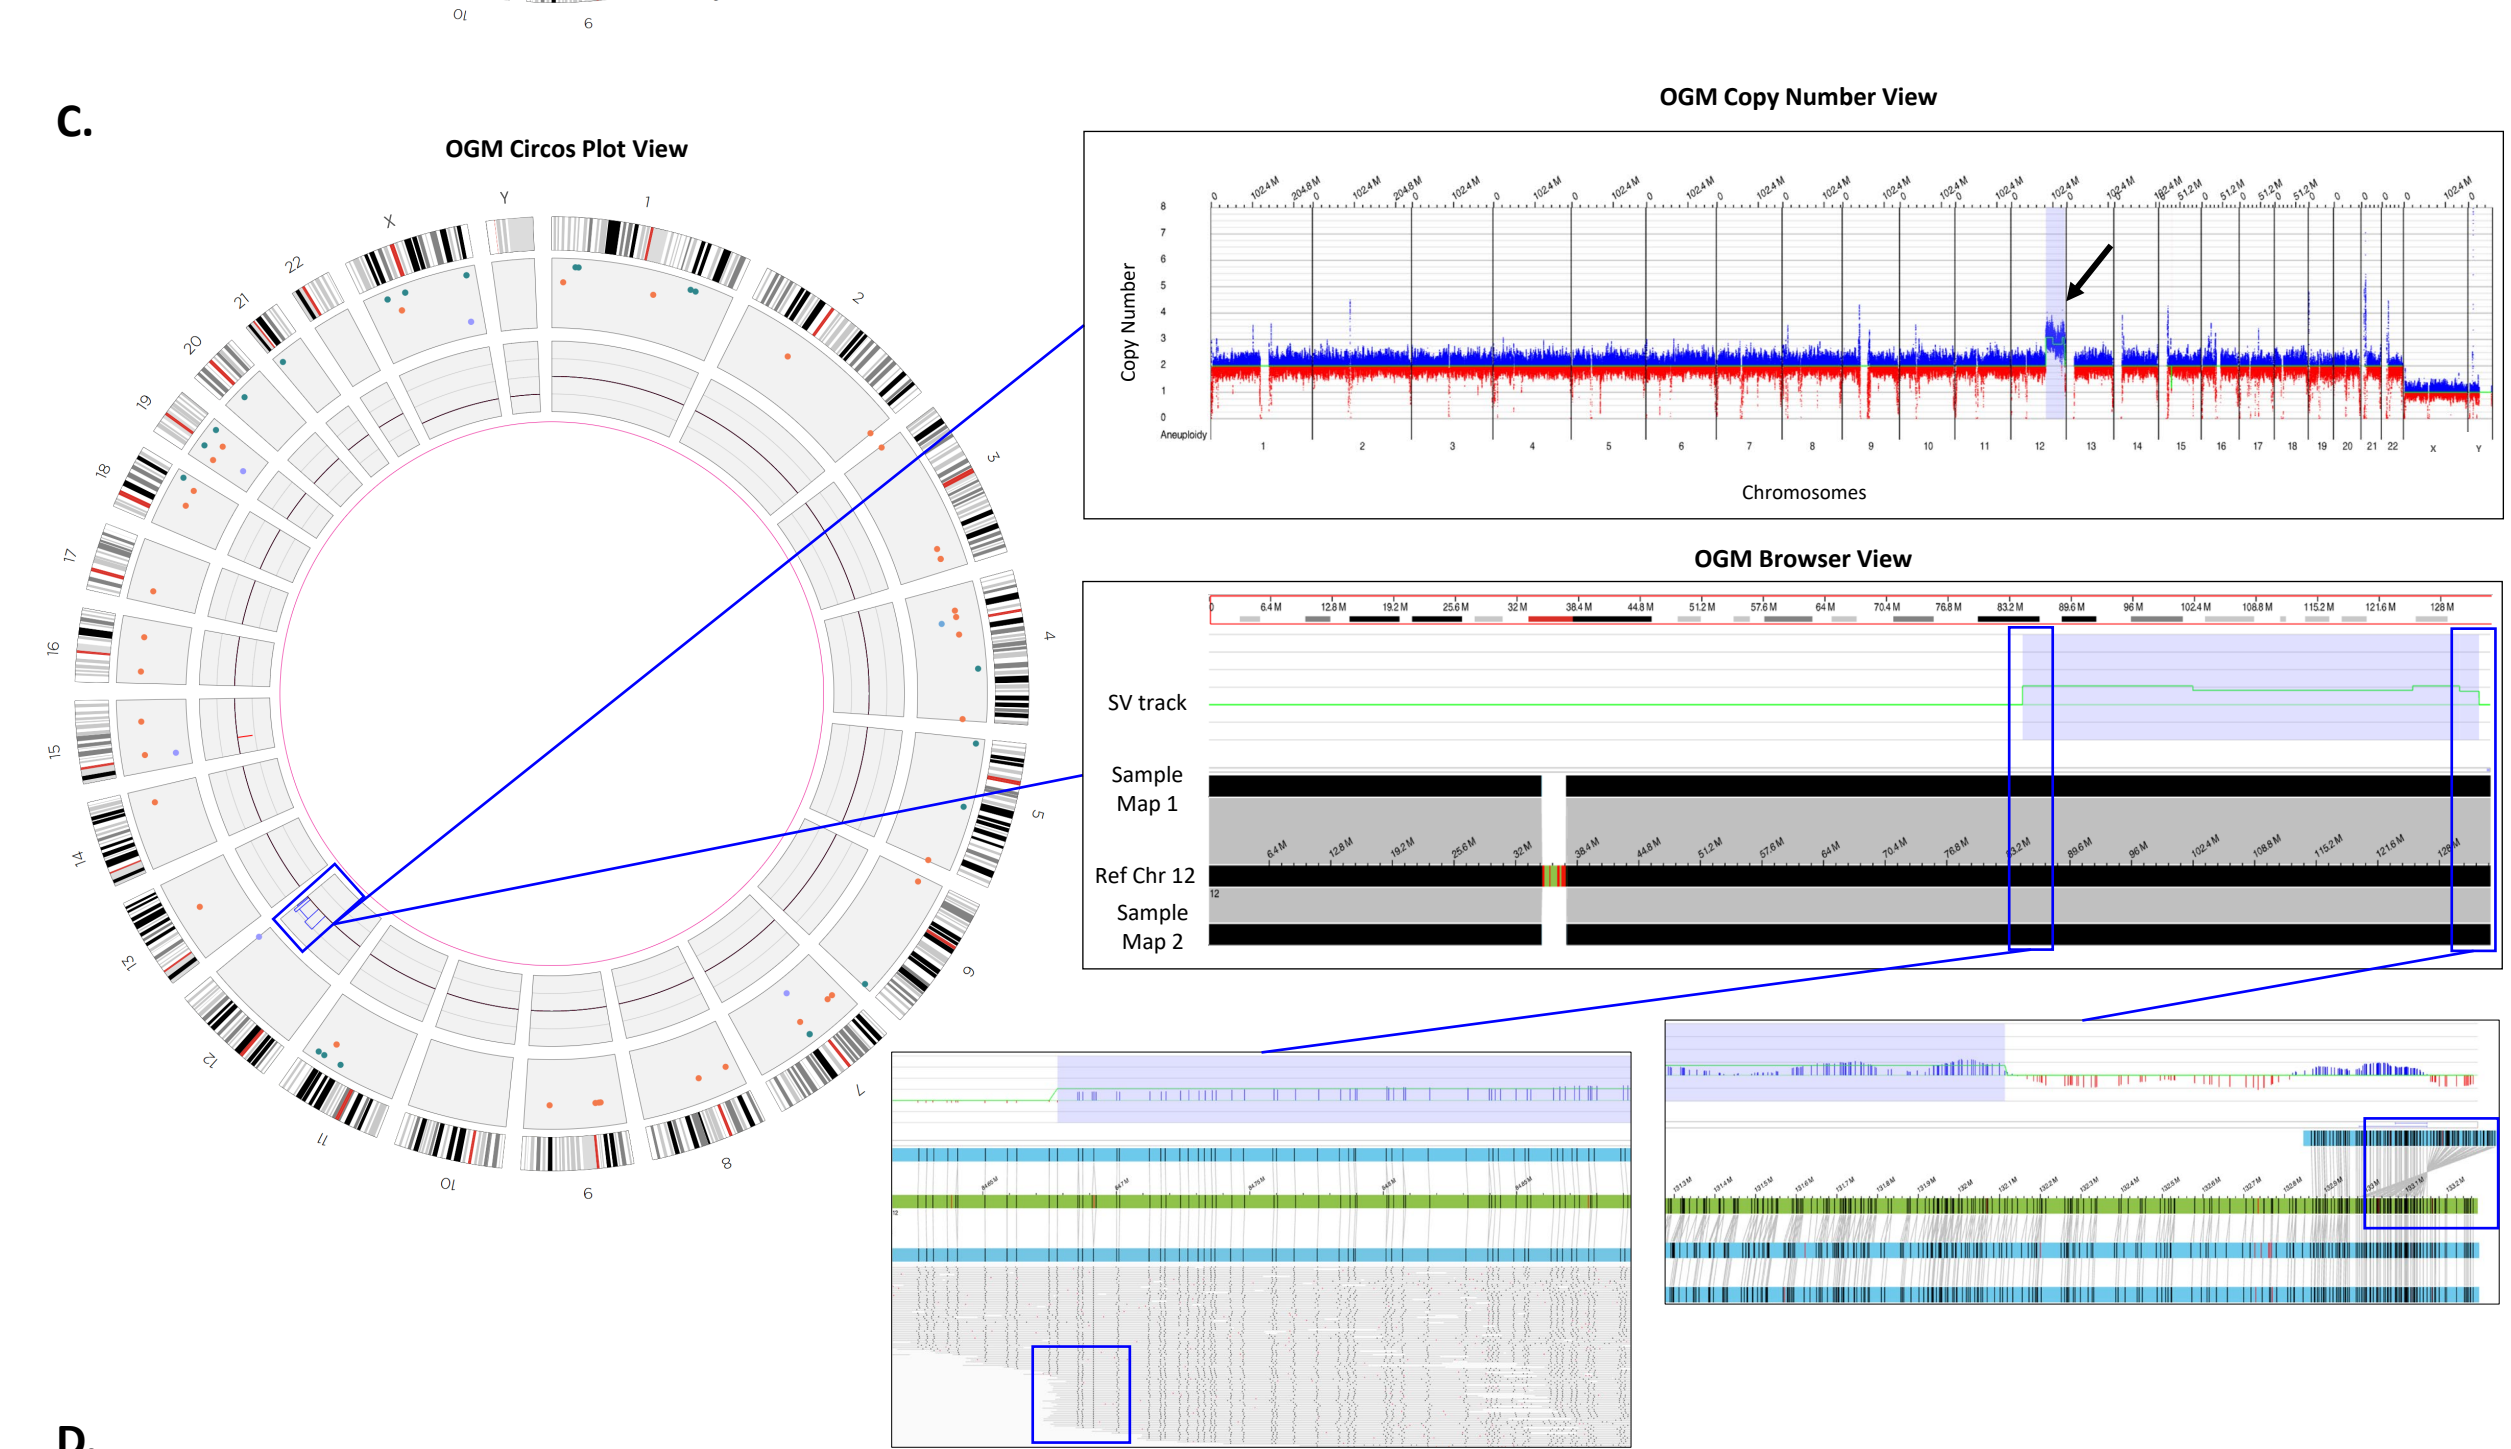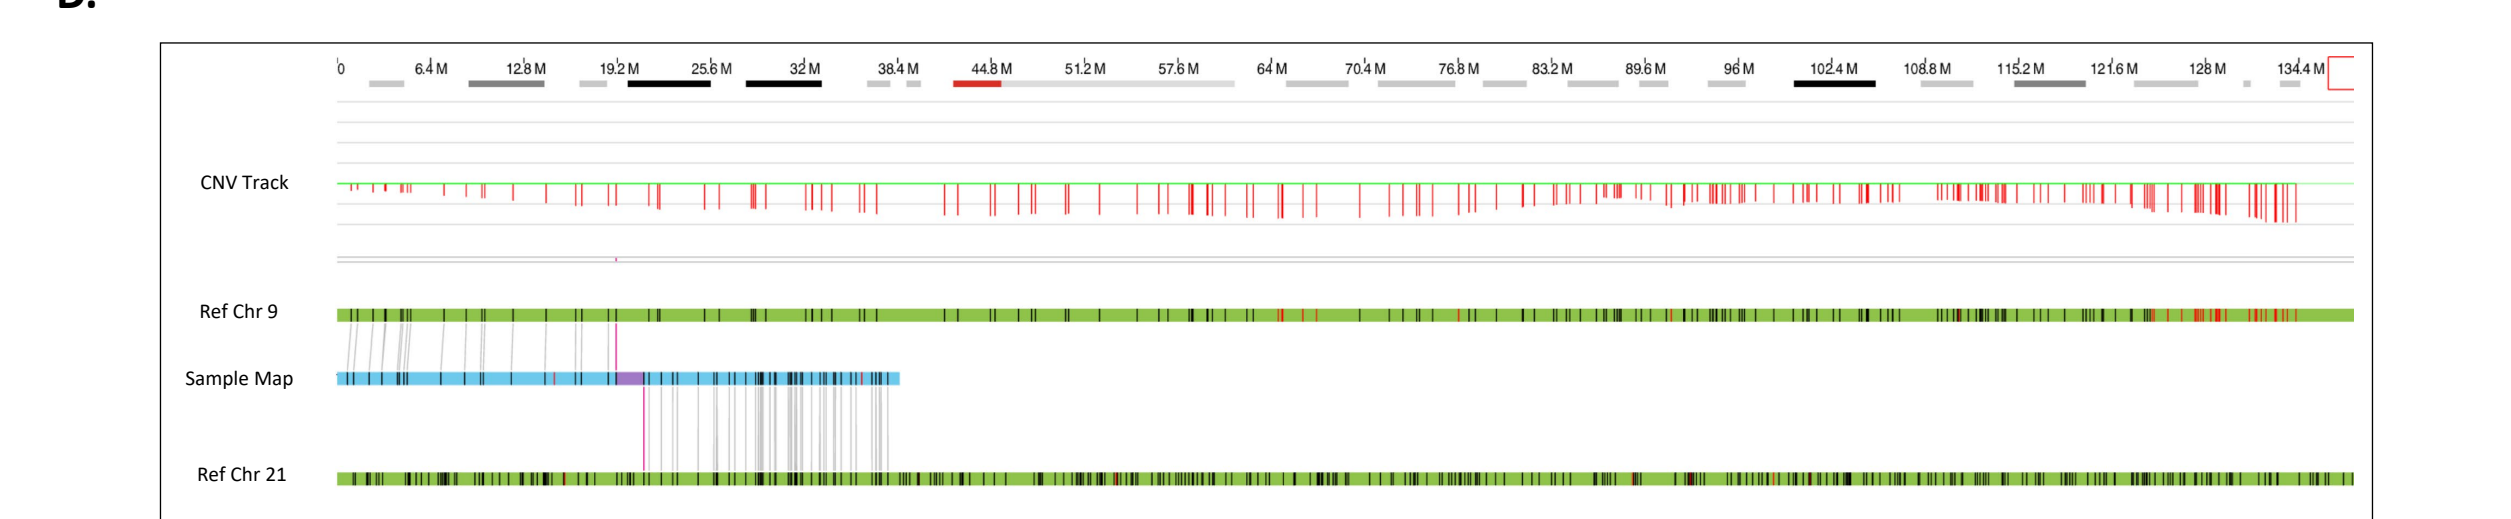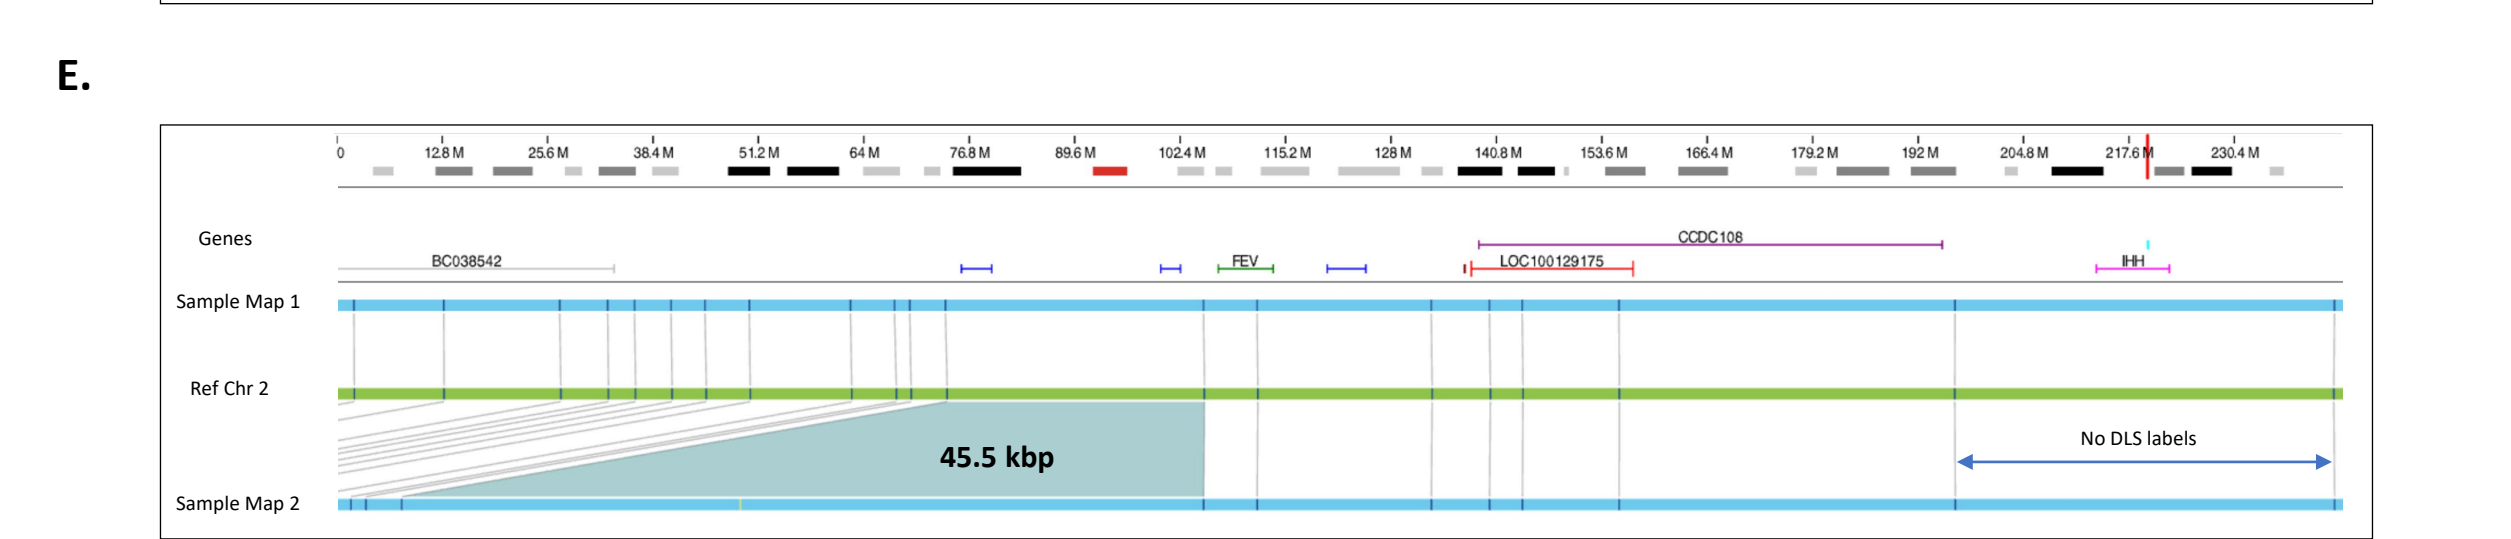

Supplement: s1 [file s1]
